# Supplementary material
Source: HighWire-hosted journal article supplement (https://bmjopen.bmj.com/content/11/12/e056869)
Supplement: inline-supplementary-material-1 [file inline-supplementary-material-1.pdf]

**Supplementary file. Semi-structured interview-guide**

(Title of article: *A qualitative study of GPs' views and experiences of population-based preconception expanded carrier screening in the Netherlands: Bioethical perspectives*)

Due to the semi-structured format of the interviews the topics and examples of questions are stated.

**First impression of the test**

1. Could you describe how you got involved in the PCS project? When did you first hear about it?

**Implications of the test**

2. Can you describe a general case when someone asks for the screening?

3. How do you explain to people what the test involves?

4. Could you describe different aspects of the test?

**Experiences with patients**

6. How did couples give meaning to a positive result?

7. How did couples give meaning to a negative result?

8. Did you discuss with the patients the different ways in which the results could be interpreted?

**How the test could be improved**

9. What do you think should be adjusted in how the test is offered now?

10. How do you think the future of the test looks like?

**Other questions**

Is there anything we haven't discussed that you would like to add?
